# Supplementary material
Source: MDPI journal article supplement (https://www.mdpi.com/2071-1050/7/6/7492)
Supplement: s1 [file s1]

# Environmental and Social Sustainability of the Proximity Waste Collection System: A Case-Study Evaluation at an Italian Local Scale. *Sustainability* 2015, 7, 7492-7511

Manuela Carchesio \*, Fabio Tatàno, Margherita Goffi and Michele Radi

DISBeF-Department of Basic Sciences and Foundations, University of Urbino “Carlo Bo”, Campus Scientifico “E. Mattei”, Urbino I-61029, Italy; E-Mails: fabio.tatano@uniurb.it (F.T.); cerasa@libero.it (M.G.); m.radi@live.it (M.R.)

\* Author to whom correspondence should be addressed; E-Mail: manuela.carchesio@uniurb.it; Tel.: +39-0722-304264; Fax: +39-0722-304265.

Academic Editor: Vincenzo Torretta

Received: 7 February 2015 / Accepted: 1 June 2015 / Published: 11 June 2015

**Table S1.** Corresponding percentage values of the number of set-outs (*No.s.o.*) per cap-device referring to different temporal units (months, week days, time frames). The values are all referred to 2012.

| Set-Outs vs. Temporal Unit                     |           | Area1 | Area2 | Area3 | Total Area |
|------------------------------------------------|-----------|-------|-------|-------|------------|
| No.s.o. month <sup>-1</sup> year <sup>-1</sup> | January   | 10%   | 10%   | 9%    | 10%        |
|                                                | February  | 8%    | 8%    | 7%    | 8%         |
|                                                | March     | 11%   | 10%   | 10%   | 11%        |
|                                                | April     | 11%   | 11%   | 11%   | 11%        |
|                                                | May       | 4%    | 5%    | 5%    | 4%         |
|                                                | June      | 3%    | 5%    | 6%    | 4%         |
|                                                | July      | 11%   | 11%   | 11%   | 11%        |
|                                                | August    | 11%   | 11%   | 12%   | 11%        |
|                                                | September | 3%    | 4%    | 3%    | 3%         |
|                                                | October   | 11%   | 8%    | 9%    | 10%        |
|                                                | November  | 9%    | 7%    | 8%    | 9%         |
|                                                | December  | 9%    | 10%   | 8%    | 9%         |
|                                                | 100%      | 100%  | 100%  | 100%  |            |

Table S1. *Cont.*

| Set-Outs vs. Temporal Unit                               |                | Area1 | Area2 | Area3 | Total Area |
|----------------------------------------------------------|----------------|-------|-------|-------|------------|
| <i>No.s.o. week's day<sup>-1</sup> year<sup>-1</sup></i> | Monday         | 15%   | 14%   | 14%   | 15%        |
|                                                          | Tuesday        | 14%   | 14%   | 13%   | 14%        |
|                                                          | Wednesday      | 14%   | 14%   | 14%   | 14%        |
|                                                          | Thursday       | 14%   | 15%   | 14%   | 14%        |
|                                                          | Friday         | 14%   | 14%   | 17%   | 14%        |
|                                                          | Saturday       | 16%   | 16%   | 16%   | 16%        |
|                                                          | Sunday         | 13%   | 13%   | 11%   | 13%        |
|                                                          |                | 100%  | 100%  | 100%  | 100%       |
| <i>No.s.o. time frame<sup>-1</sup> year<sup>-1</sup></i> | 0–2 a.m.       | 0%    | 0%    | 1%    | 0%         |
|                                                          | 2–4 a.m.       | 0%    | 0%    | 0%    | 0%         |
|                                                          | 4–6 a.m.       | 0%    | 0%    | 0%    | 0%         |
|                                                          | 6–8 a.m.       | 6%    | 6%    | 8%    | 6%         |
|                                                          | 8–10 a.m.      | 18%   | 17%   | 17%   | 18%        |
|                                                          | 10–12 a.m.     | 17%   | 15%   | 18%   | 17%        |
|                                                          | 12 a.m.–2 p.m. | 11%   | 10%   | 18%   | 11%        |
|                                                          | 2–4 p.m.       | 13%   | 15%   | 10%   | 13%        |
|                                                          | 4–6 p.m.       | 13%   | 13%   | 9%    | 13%        |
|                                                          | 6–8 p.m.       | 10%   | 11%   | 9%    | 10%        |
|                                                          | 8–10 p.m.      | 8%    | 9%    | 6%    | 8%         |
|                                                          | 10–12 p.m.     | 2%    | 3%    | 3%    | 2%         |
|                                                          |                | 100%  | 100%  | 100%  | 100%       |
